# Supplementary material for: Hydrobromic acid assisted crystallization of MAPbI3−xClx for enhanced power conversion efficiency in perovskite solar cells
Source: Royal Society of Chemistry journal article supplement (doi:10.1039/c6ra07536c), 2016-01-01
Supplement: c6ra07536c1.pdf [file c6ra07536c1.pdf]

## Supporting information

The amount of HCl, HI and H<sub>2</sub>O is 7 vol%, 5 vol% and 4 vol% (the stoichiometric HCl from 33 wt% hydrochloric and the stoichiometric HI from 47 wt% hydroiodic), respectively. The doped amount of H<sub>2</sub>O is equal to amount of H<sub>2</sub>O in HBr, the result also means excluding the influence of H<sub>2</sub>O, and the halogen ions played an more important role.

Table S1. Solar cell performance of MAPbI<sub>3-x</sub>Cl<sub>x</sub> films with different percentages of HBr (vol).

| HBr    | FF   | $J_{sc}(\text{mA}/\text{cm}^2)$ | $V_{oc}(\text{V})$ | PCE(%) |
|--------|------|---------------------------------|--------------------|--------|
| 0 vol% | 0.72 | 19.12                           | 0.87               | 12.13  |
| 5 vol% | 0.73 | 20.81                           | 0.90               | 13.67  |
| 7 vol% | 0.77 | 21.71                           | 0.94               | 15.76  |
| 9 vol% | 0.71 | 19.97                           | 0.89               | 12.61  |

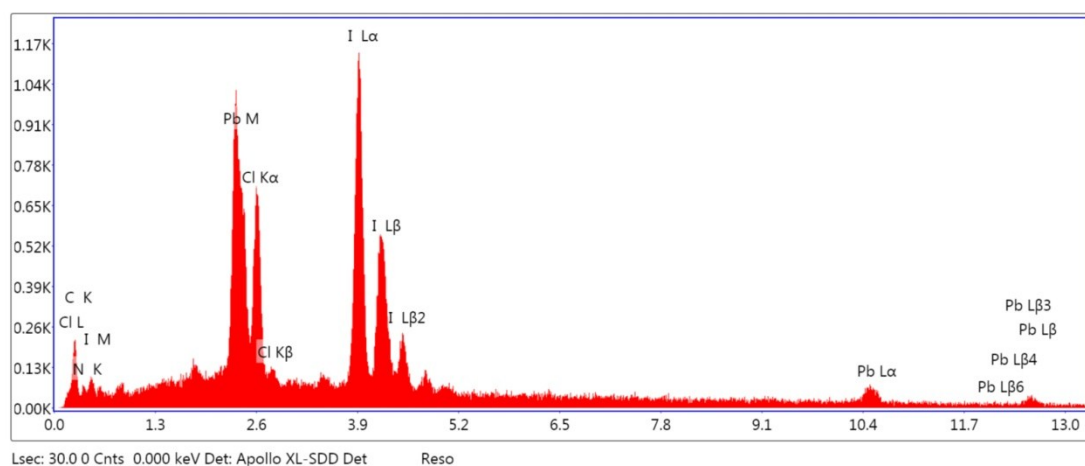

Fig. S1. EDS spectra of HBr-MAPbI<sub>3-x</sub>Cl<sub>x</sub> film on ITO/TiO<sub>2</sub>.

The added HBr is weaker thermostability and few amount, so the resulting perovskite film is MAPbI<sub>3-x</sub>Cl<sub>x</sub>. The blue shift of UV-Vis spectra is ascribed to added HBr, however, the red shift of EQE is ascribed to high quality perovskite films (crystallinity).

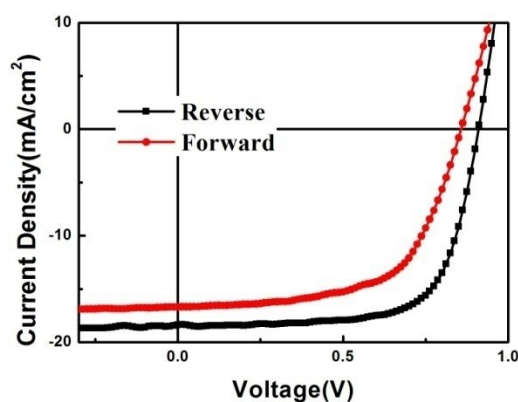

Fig S2. Representative without HBr-modified device scanned from different directions.

The hysteresis data of solar cell without HBr treatment is shown in Fig S2. The HBr treatment can reduced hysteresis effect.
